# Supplementary material
Source: PubMed Central journal article supplement (PMC7948512)
Supplement: NIHMS1671375-supplement-Final_SI_version.pdf [file NIHMS1671375-supplement-Final_SI_version.pdf]

# **A Diverse Range of Hemozoin Inhibiting Scaffolds Act on *Plasmodium falciparum* as Heme Complexes**

Roxanne Openshaw,<sup>†</sup> Keletso Maepa,<sup>‡</sup> Stefan J. Benjamin,<sup>†</sup> Lauren Wainwright,<sup>†</sup> Jill M. Combrinck,<sup>‡</sup> Roger Hunter<sup>†</sup> and Timothy J. Egan<sup>\*†,‡</sup>

<sup>†</sup>Department of Chemistry, University of Cape Town, Private Bag Rondebosch, Cape Town 7701, South Africa <sup>‡</sup>Division of Clinical Pharmacology, Department of Medicine and

<sup>‡</sup>Institute of Infectious Disease and Molecular Medicine, University of Cape Town, Observatory, Cape Town 7925, South Africa

## **Corresponding Author**

\*E-mail: [timothy.egan@uct.ac.za](mailto:timothy.egan@uct.ac.za)

## **Supporting Information**

**Table S1:**  $\beta$ -hematin inhibition and parasite growth inhibition  $IC_{50}$  values in the NF54 strain for the compounds investigated in this study.

| Scaffold          | Compound  | $\beta$ -hematin inhibition<br>$IC_{50}$ ( $\mu$ M) | NF54 parasite $IC_{50}$<br>( $\mu$ M) |
|-------------------|-----------|-----------------------------------------------------|---------------------------------------|
| Quinolines        | <b>1</b>  | $31.5 \pm 0.5^1$                                    | $0.0190 \pm 0.0004$                   |
|                   | <b>2</b>  | $17 \pm 2$                                          | $0.0204 \pm 0.0007$                   |
| Benzamides        | <b>3</b>  | $13 \pm 1^1$                                        | $5.0 \pm 1.0^1$                       |
|                   | <b>4</b>  | $6.8 \pm 0.1^1$                                     | $0.6 \pm 0.1$                         |
|                   | <b>5</b>  | $> 1000^1$                                          | $8.1 \pm 0.5$                         |
| Triarylimidazoles | <b>6</b>  | $13.8 \pm 0.4^2$                                    | $1.8 \pm 0.1$                         |
|                   | <b>7</b>  | $14.6 \pm 0.2^2$                                    | $7.0 \pm 0.1$                         |
|                   | <b>8</b>  | $19 \pm 1^2$                                        | $15 \pm 4$                            |
|                   | <b>9</b>  | $> 1000^2$                                          | $4.2 \pm 0.1$                         |
| Quinazolines      | <b>10</b> | $20 \pm 2$                                          | $0.189 \pm 0.006$                     |
|                   | <b>11</b> | $23 \pm 2$                                          | $0.29 \pm 0.02$                       |
|                   | <b>12</b> | $26 \pm 3$                                          | $0.240 \pm 0.008$                     |
| Benzimidazoles    | <b>13</b> | $32 \pm 1^3$                                        | $0.62 \pm 0.05$                       |
|                   | <b>14</b> | $24 \pm 4^3$                                        | $1.3 \pm 0.2$                         |
|                   | <b>15</b> | $38 \pm 1^3$                                        | $15.0 \pm 0.3$                        |
|                   | <b>16</b> | $15.6 \pm 0.5^3$                                    | $2.3 \pm 0.6$                         |
| Benzothiazole     | <b>17</b> | $30 \pm 2$                                          | $1.50 \pm 0.02$                       |
| Benzoxazole       | <b>18</b> | $22 \pm 1$                                          | $7.49 \pm 0.06$                       |

**Table S2:** Exchangeable heme (fmols heme per cell) at the IC<sub>50</sub> and cellular accumulation ratios (CAR  $\pm$  SD) for compounds investigated in this study. Amounts of accumulated active compounds are given by IC<sub>50</sub>  $\times$  CAR  $\times$  mean volume of the infected RBC (V<sub>cell</sub>).

| Scaffold         | Compound  | Heme<br>(fmol/cell) | CAR                              | IC <sub>50</sub> $\times$ CAR $\times$<br>V <sub>cell</sub> (fmol/cell) <sup>a</sup> |
|------------------|-----------|---------------------|----------------------------------|--------------------------------------------------------------------------------------|
| quinoline        | <b>1</b>  | 0.15 $\pm$ 0.02     | 105 342 $\pm$ 3 365 <sup>4</sup> | 0.17 $\pm$ 0.01                                                                      |
|                  | <b>2</b>  | 0.14 $\pm$ 0.02     | 98 024 $\pm$ 15 296 <sup>4</sup> | 0.18 $\pm$ 0.03                                                                      |
| benzamide        | <b>4</b>  | 0.29 $\pm$ 0.05     | 5 934 $\pm$ 945                  | 0.30 $\pm$ 0.07                                                                      |
| triarylimidazole | <b>6</b>  | 0.26 $\pm$ 0.09     | 479 $\pm$ 223                    | 0.07 $\pm$ 0.03                                                                      |
| quinazoline      | <b>10</b> | 0.050 $\pm$ 0.007   | 1 757 $\pm$ 242                  | 0.028 $\pm$ 0.004                                                                    |
|                  | <b>11</b> | 0.062 $\pm$ 0.007   | 1 746 $\pm$ 206                  | 0.042 $\pm$ 0.006                                                                    |
|                  | <b>12</b> | 0.08 $\pm$ 0.02     | 1 823 $\pm$ 381                  | 0.037 $\pm$ 0.008                                                                    |
| benzimidazole    | <b>13</b> | 0.23 $\pm$ 0.03     | 5 305 $\pm$ 1 079                | 0.27 $\pm$ 0.06                                                                      |
|                  | <b>14</b> | 0.33 $\pm$ 0.01     | 1 912 $\pm$ 276                  | 0.20 $\pm$ 0.04                                                                      |
|                  | <b>16</b> | 0.52 $\pm$ 0.02     | 2 039 $\pm$ 757                  | 0.4 $\pm$ 0.2                                                                        |
| benzothiazole    | <b>17</b> | 0.25 $\pm$ 0.03     | 1 599 $\pm$ 552                  | 0.20 $\pm$ 0.07                                                                      |

<sup>a</sup>V<sub>cell</sub> for a parasitized RBC = 84  $\pm$  6 fL;<sup>5</sup>

**Table S3.** Statistical measures of difference between Raman spectra based on separation of centroids between clusters in PCA using Welch's t-test.

| Spectrum of component 1                      | Spectrum of component 2            | P        | R <sup>2</sup> |
|----------------------------------------------|------------------------------------|----------|----------------|
| Putative heme- <b>13</b> complex in parasite | oxyhemoglobin                      | < 0.0001 | 0.6082         |
|                                              | deoxyhemoglobin                    | < 0.0001 | 0.7523         |
|                                              | hemozoin                           | < 0.0001 | 0.7729         |
|                                              | hemin                              | < 0.0001 | 0.6017         |
|                                              | hematin                            | < 0.0001 | 0.8267         |
|                                              | <b>13</b>                          | < 0.0001 | 0.8889         |
|                                              | synthetic hemin- <b>13</b> complex | 0.8043   | 0.0005         |
| Hemozoin                                     | oxyhemoglobin                      | < 0.0001 | 0.8364         |
|                                              | deoxyhemoglobin                    | < 0.0001 | 0.8887         |
|                                              | hemin                              | < 0.0001 | 0.8349         |
|                                              | hematin                            | < 0.0001 | 0.8104         |
|                                              | <b>13</b>                          | < 0.0001 | 0.8551         |
|                                              | $\beta$ -hematin                   | 0.8528   | 0.0001         |
| Oxyhemoglobin                                | deoxyhemoglobin                    | < 0.0001 | 0.8941         |
|                                              | hemin                              | < 0.0001 | 0.3933         |
|                                              | hematin                            | < 0.0001 | 0.3467         |
|                                              | <b>13</b>                          | < 0.0001 | 0.6501         |

## I. oxyhemoglobin

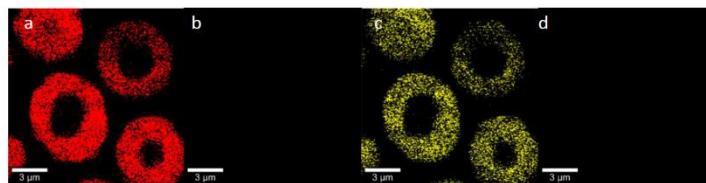

## II. deoxyhemoglobin

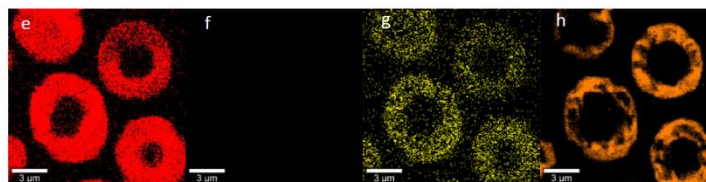

## III. hemozoin

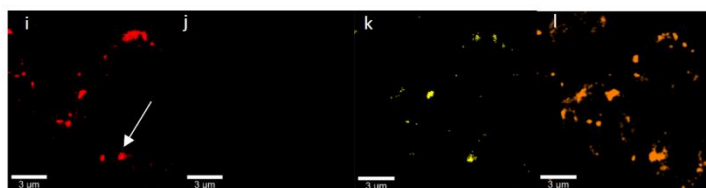

**Figure S1.** Confocal Raman true mapping images, obtained using true component analysis and filter viewer tools, for untreated infected RBCs. Cells contain three distinct Fe(III)PPIX complexes: (I) oxyhemoglobin, (II) deoxyhemoglobin and (III) hemozoin which were imaged at specific Raman peaks using the filter viewer tool: a, e and i)  $754\text{ cm}^{-1}$  (red); b, f and j)  $1080\text{ cm}^{-1}$  (green); c, g and k)  $1090\text{ cm}^{-1}$  (yellow) and; d, h and l)  $1642\text{ cm}^{-1}$  (orange). These peaks have previously been assigned respectively to  $\nu_{15}$  ( $\nu(\text{pyrrole breathing})_{\text{asym}}$ ),  $\nu_{23}$  ( $\nu(\text{C}\beta\text{C}1)_{\text{asym}}$ ),  $\nu_{23}$  ( $\nu(\text{C}\beta\text{C}1)_{\text{asym}}$  and/or  $\gamma(=\text{C}\beta\text{H}_2)_{\text{sym}}$ ) and  $\nu_{10}$  ( $\nu(\text{C}\alpha\text{C}_m)_{\text{asym}}$ ).<sup>6-9</sup>  $15 \times 15$  points per image and points per line and 0.05 s integration time with a run time = 35 min. Note the absence of a signal at  $1080\text{ cm}^{-1}$  for any of these Fe(III)PPIX species. White arrows indicate probable extracellular hemozoin crystals probably arising from limited cell lysis during sample preparation.

**I. oxyhemoglobin**

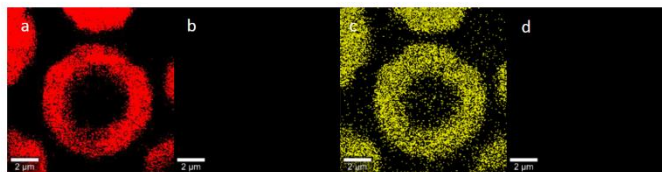

**II. deoxyhemoglobin**

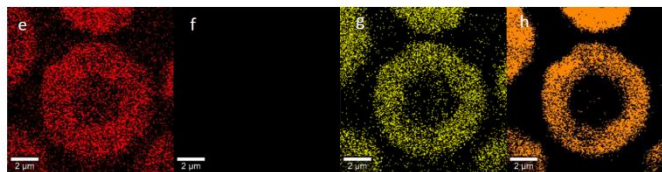

**III. hemozoin**

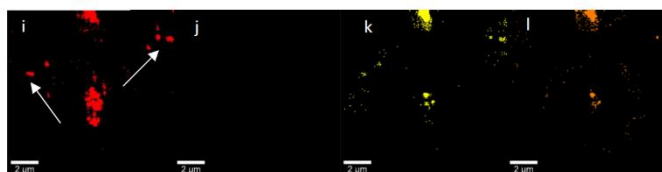

**IV. Fe(III)PPIX-test compound 13 complex**

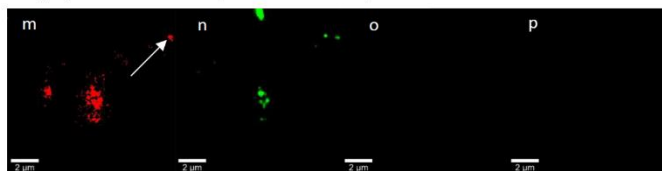

**Figure S2.** Confocal Raman true mapping images obtained, using true component analysis and filter viewer tools, for test compound **13**-treated infected RBCs. The cells contained four distinct Fe(III)PPIX complexes: (I) oxyhemoglobin, (II) deoxyhemoglobin, (III) hemozoin and (IV) Fe(III)PPIX-test compound **13** complex which were imaged at specific Raman peaks using the filter viewer tool: a, e, i and m)  $754\text{ cm}^{-1}$  (red); b, f, j and h)  $1080\text{ cm}^{-1}$  (green); c, g, k and o)  $1090\text{ cm}^{-1}$  (yellow) and; d, h, l and p)  $1642\text{ cm}^{-1}$  (orange).  $15 \times 15$  points per image and points per line and 0.05 s integration time with a run time = 35 min. White arrows indicate probable extracellular hemozoin crystals.

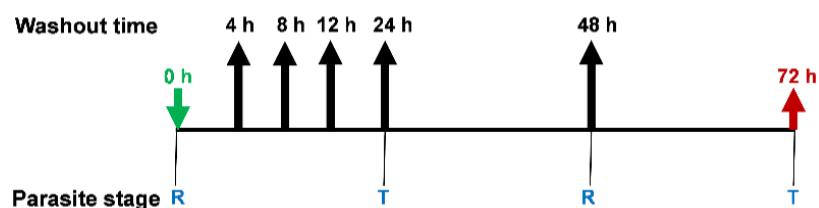

**Figure S3.** Strategy of the speed of killing experiment: 0 h = time of inoculation, 72 h = time of assay, R = ring stage, T = trophozoite, washout times indicated by black arrows.

1. Wicht, K. J.; Combrinck, J. M.; Smith, P. J.; Hunter, R.; Egan, T. J., Identification and SAR evaluation of hemozoin-inhibiting benzamides active against *Plasmodium falciparum*. *J. Med. Chem.* **2016**, *59*, 6512-6530.
2. Wicht, K. J.; Combrinck, J. M.; Smith, P. J.; Hunter, R.; Egan, T. J., Identification and mechanistic evaluation of hemozoin-inhibiting triarylimidazoles active against *Plasmodium falciparum*. *ACS Med. Chem. Lett.* **2017**, *8*, 201-205.
3. L'abbate, F. P.; Müller, R.; Openshaw, R.; Combrinck, J. M.; de Villiers, K. A.; Hunter, R.; Egan, T. J., Hemozoin inhibiting 2-phenylbenzimidazoles active against malaria parasites. *Eur. J. Med. Chem.* **2018**, *159*, 243-254.
4. Wicht, K. J. Discovery of benzamides and triarylimidazoles active against *Plasmodium falciparum* via haemozoin inhibition: high throughput screening, synthesis and structure-activity relationships. University of Cape Town <https://open.uct.ac.za/handle/11427/16939>, 2015.
5. Okafur, U. E.; Tsoka-Gwegweni, J. M.; Bibirigea, A.; Irimie, A.; Tomuleasa, C., Parasitaemia and haematological changes in malaria-infected refugees in South Africa. *S. Afr. Med. J.* **2016**, *106*, 413-416.

6. Wood, B. R.; Langford, S. J.; Cooke, B. M.; Glenister, F. K.; Lim, J.; McNaughton, D., Raman imaging of hemozoin within the food vacuole of *Plasmodium falciparum* trophozoites. *FEBS Lett.* **2003**, *554*, 247-252.
7. Webster, G. T.; Tilley, L.; Deed, S.; McNaughton, D.; Wood, B. R., Resonance Raman spectroscopy can detect structural changes in haemozoin (malaria pigment) following incubation with chloroquine infected erythrocytes. *FEBS Lett.* **2008**, *582*, 1087-1092.
8. Abe, M.; Kitagawa, T.; Kyogoku, Y., Resonance Raman spectra of octaethylporphyrinatonicel(II) and meso-deuterated and nitrogen-15 substituted derivatives. II. A normal coordinate analysis *J. Chem. Phys.* **1978**, *69*, 4526-4534.
9. Hu, S.; Smith, K. M.; Spiro, T. G., Assignment of protoheme resonance Raman spectrum by heme labeling in myoglobin. *J. Am. Chem. Soc.* **1996**, *118*, 12638-12646.
